# Supplementary material
Source: PubMed Central journal article supplement (PMC2866782)

## SUPPLEMENTAL MATERIAL

### Supplemental Methods

Mitochondrial oxygen consumption was measured at 37°C by polarography using a Clark type electrode (Oxygraph, Hansatech, Norfolk, UK). Experiments were initiated by addition of ~0.2 mg mitochondria in 1 ml of respiration buffer (in mM; 100 KCL, 5 KH<sub>2</sub>PO<sub>4</sub>, 1 EGTA, 50 MOPS, 10 MgCl<sub>2</sub>) containing 0.2% BSA. 2mM pyruvate and 2 mM malate (final concentration) were used as a complex I respiratory substrate. The maximal respiration (state 3), defined as the rate of respiration in the presence of ADP was initiated by adding 0.25 mM ADP to the respiration chamber containing mitochondria and respiratory substrates. State 4 (resting respiration) was obtained when the complete conversion (phosphorylation) of ADP to ATP was reached. The respiratory control ratio (RCR) commonly referred to as an index of mitochondrial integrity (coupled respiration) was calculated from the ratio of state 3 to state 4 respiration.

### Figure Legends

**Supplemental Figure S1.** Measurement of respiration in isolated rat heart mitochondria.

**A.** Representative O<sub>2</sub> electrode tracing obtained with rat heart mitochondria. Inflections represent changes in respiration rates. P/M = Pyruvate/Malate. Respiration rates were determined from tracings (2 = state 3 respiration rate, 3= state 4 respiration). **B.** State 3 and state 4 respiration rates. **C.** Respiratory control ratio.

**Supplemental Figure S2.** Cytochrome *c* release in WT and *cypD*<sup>-/-</sup> MEFs. **A.** Cells infected with an adenovirus encoding β-gal or Bnip3 for 24 h were stained with anti-

COX IV and anti-cytochrome *c* and visualized by fluorescence microscopy. **B.** Quantitative analysis of cells exhibiting release of cytochrome *c* (n=4).

**Supplemental Figure S3.** Cytochrome *c* release in *cypD*<sup>-/-</sup> MEFs reconstituted with cyclophilin D. **A.** Cells infected with adenoviruses encoding  $\beta$ -gal or Bnip3 plus  $\beta$ -gal or *cypD* for 24 h were stained with anti-COX IV and anti-cytochrome *c* and visualized by fluorescence microscopy. **B.** Quantitative analysis of cells exhibiting release of cytochrome *c* (n=4).

**Supplemental Figure S4.** Reconstitution of cyclophilin D restores H<sub>2</sub>O<sub>2</sub>-mediated release of calcein from mitochondria in *cypD*<sup>-/-</sup> MEFs. Cells were infected with  $\beta$ -gal or Bnip3 plus  $\beta$ -gal or *cypD* for 24 h and then loaded with 1  $\mu$ M calcein-AM and 5 mM CoCl<sub>2</sub>. Alternatively, the cells were infected with  $\beta$ -gal or *cypD* for 24 h and then treated with 250  $\mu$ M H<sub>2</sub>O<sub>2</sub>.

# Supplemental Figure S1

A.

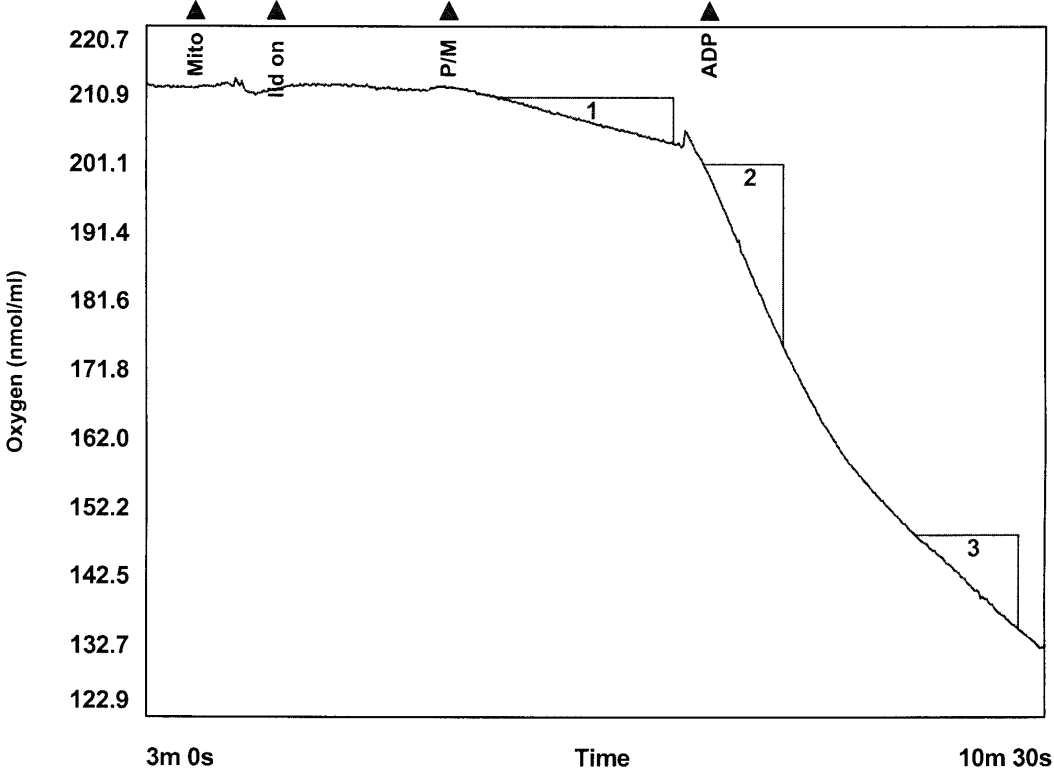

B.

## Mitochondria Respiratory Function

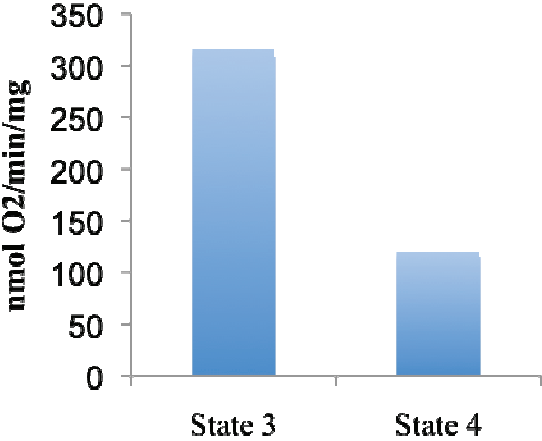

C.

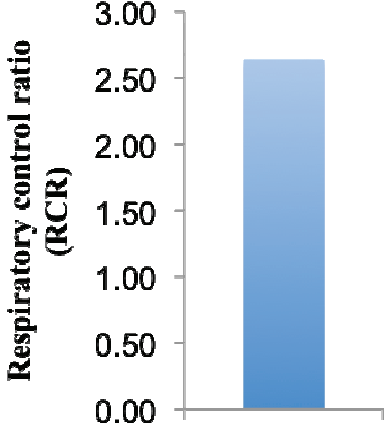

## Supplemental Figure S2

A.

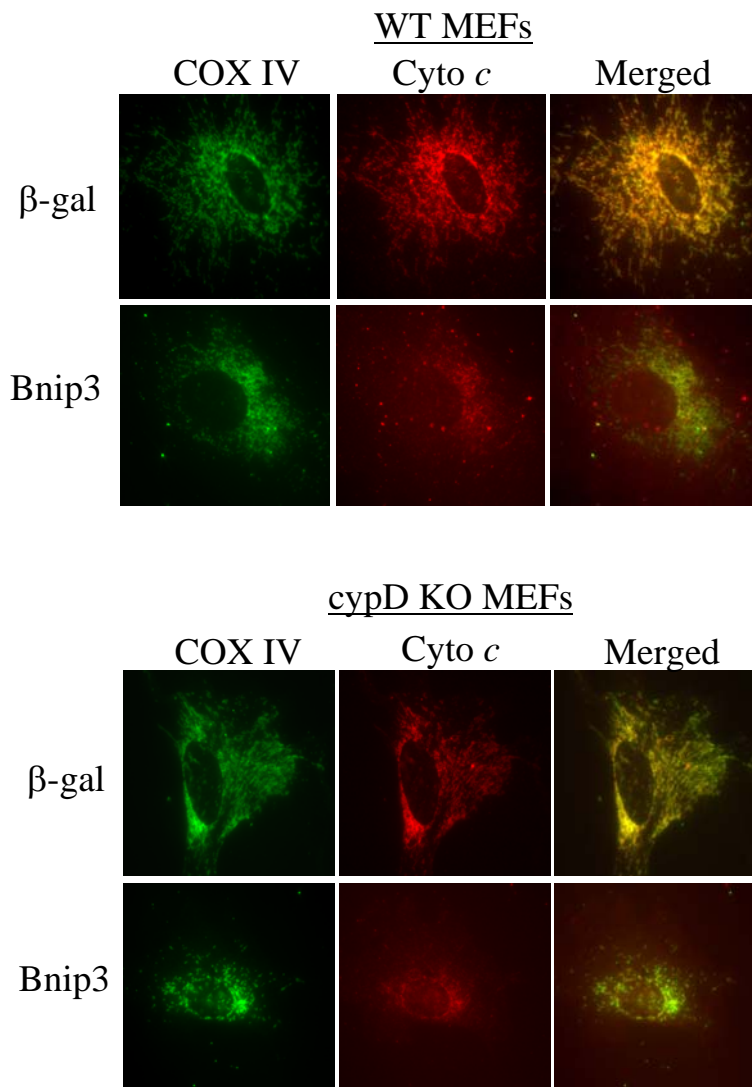

B.

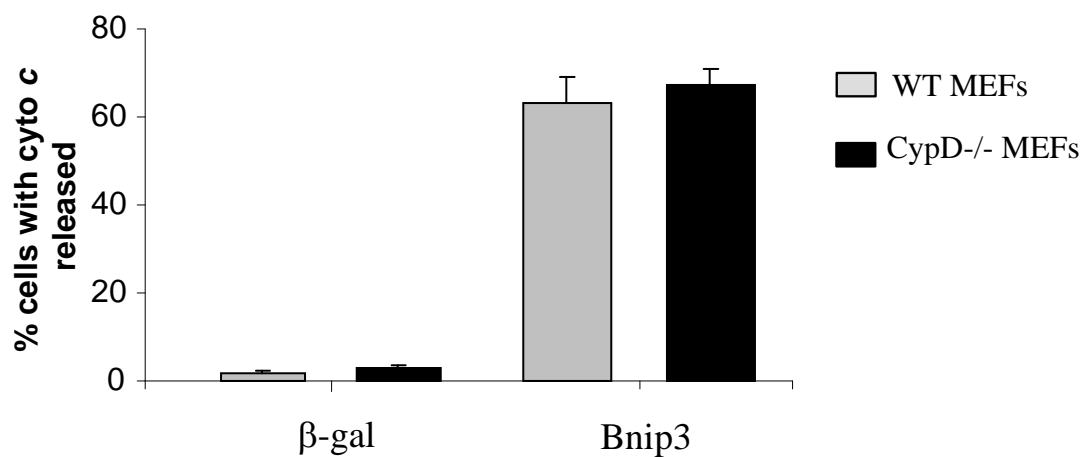

## Supplemental Figure S3

A.

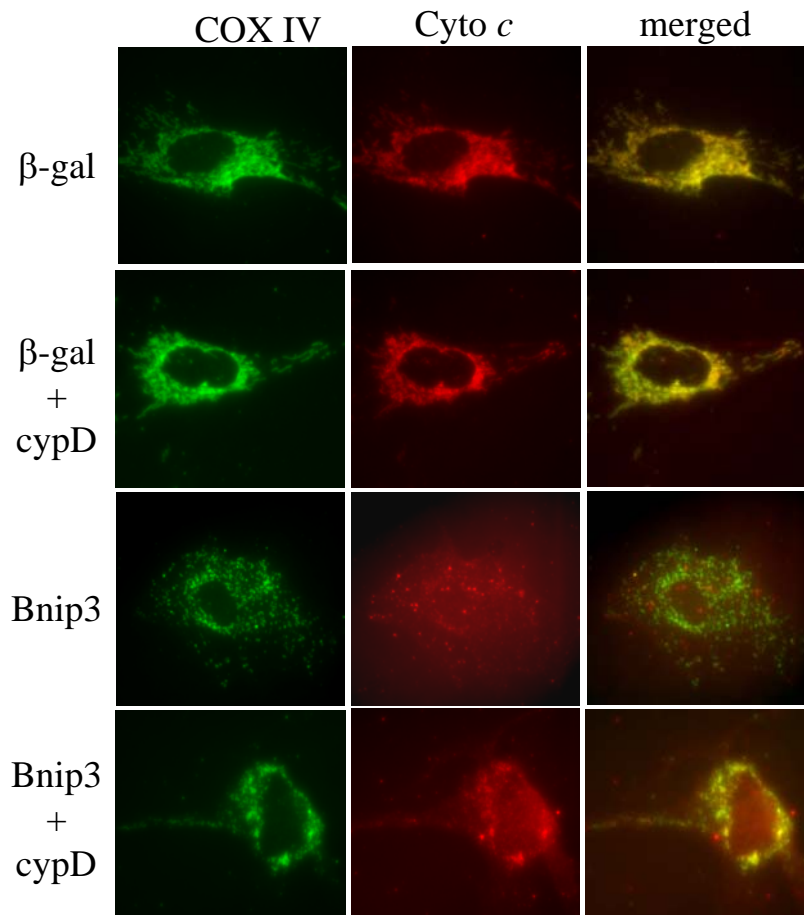

B.

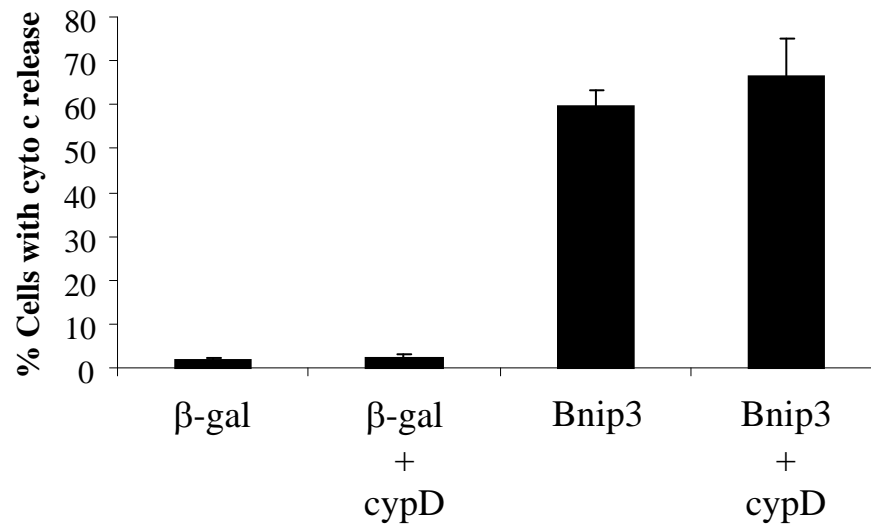

Supplemental Figure S4

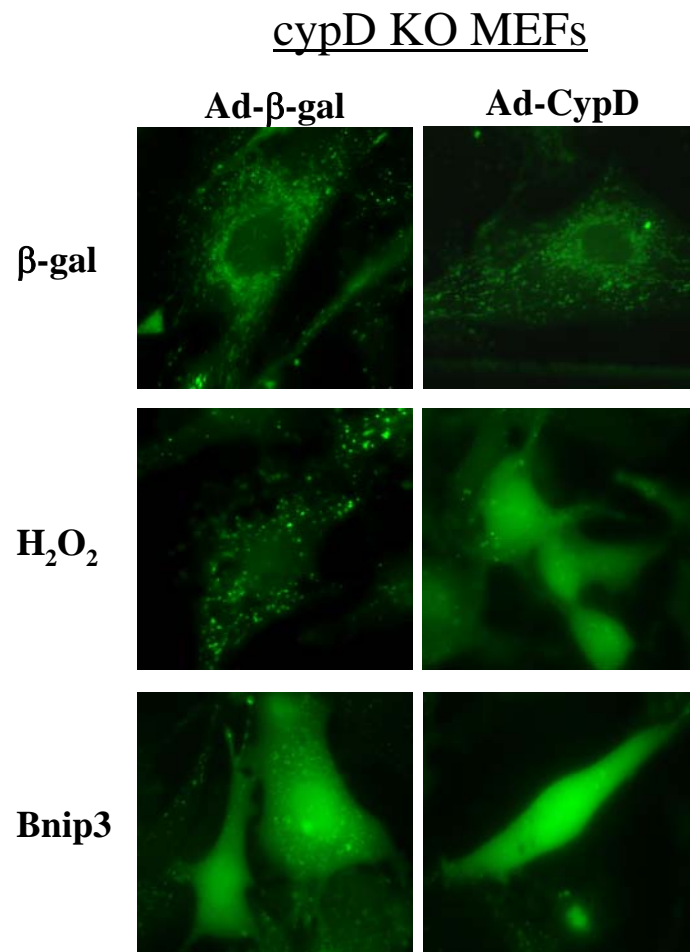

Supplement: NIHMS169903-supplement-01.pdf [file NIHMS169903-supplement-01.pdf]
